# Supplementary material
Source: ML conference proceedings conference paper supplement (https://openreview.net/forum?id=SYgoqXyoaQ)
Supplement: supplementary_material [file Neurips_2025_RFfusion_Appendix.pdf › Neurips_2025_RFfusion_Appendix.pdf]

---

# Appendix for Efficient Rectified Flow for Image Fusion

---

Anonymous Author(s)

Affiliation

Address

email

## 1 A Detailed derivation of formulas

2 In this section, we provide a detailed proof regarding posterior sampling in diffusion-based image  
3 fusion methods. The noise predicted by the diffusion model at time step  $t$  is often related to the score  
4 at the current time step. According to [4], the specific formulation can be expressed as:

$$\epsilon_\phi(x_t, t) = -\sqrt{1 - \alpha_t} \nabla_{x_t} \log p(x_t), \quad (1)$$

5 In posterior sampling, we also need to take into account the guidance from image fusion, denoted  
6 as  $i, v$ . Therefore, what we need to solve is  $\nabla_{f_t} \log p(f_t | i, v)$ , which can be expressed using Bayes'  
7 theorem as:

$$\begin{aligned} p_t(f_t | i, v) &= \frac{p_t(i, v | f_t) \cdot p_t(f_t)}{p_t(i, v)}, \\ \Rightarrow \log p_t(f_t | i, v) &= \log p_t(i, v | f_t) + \log p_t(f_t) - \log p_t(i, v), \\ \Rightarrow \nabla_{f_t} \log p_t(f_t | i, v) &= \nabla_{f_t} \log p_t(f_t) + \nabla_{f_t} \log p_t(i, v | f_t). \end{aligned} \quad (2)$$

8 Among them,  $\nabla_{f_t} \log p(f_t | i, v)$  and  $\nabla_{f_t} \log p(f_t)$  can be expressed by Equation 1 as follows:

$$\begin{aligned} \epsilon_\phi(f_t, t) &= -\sqrt{1 - \alpha_t} \nabla_{f_t} \log p_t(f_t), \\ \epsilon'_\phi(f_t, t | i, v) &= -\sqrt{1 - \alpha_t} \nabla_{f_t} \log p_t(f_t | i, v). \end{aligned} \quad (3)$$

9 Therefore, the final equation can be expressed as:

$$\begin{aligned} \epsilon'_\phi &= \epsilon_\phi(f_t, t) - \sqrt{1 - \alpha_t} \nabla_{f_t} \log p_t(i, v | f_t), \\ &\approx \epsilon_\phi(f_t, t) - \sqrt{1 - \alpha_t} \nabla_{f_t} \log p_t(i, v | \tilde{f}_{0|t}), \\ &\approx \epsilon_\phi(f_t, t) - \rho \sqrt{1 - \alpha_t} \nabla_{f_t} \|i, v - \mathcal{M}(\hat{f}_0(f_t))\|_2^2. \end{aligned} \quad (4)$$

10 Therefore, we inject the image fusion prior by correcting the predicted noise during the sampling  
11 process, thereby achieving high-quality image fusion based on the diffusion model.

## 12 B Details about the training loss

13 In the main text, the loss  $\mathcal{L}_{\text{fusion}}$  used in the training stage II is defined as follows:

$$\mathcal{L}_{\text{fusion}} = \lambda_{\text{int}} \mathcal{L}_{\text{int}} + \lambda_{\text{SSIM}} \mathcal{L}_{\text{SSIM}} + \lambda_{\text{grad}} \mathcal{L}_{\text{grad}} + \lambda_{\text{color}} \mathcal{L}_{\text{color}} + \lambda_{\text{mask}} \mathcal{L}_{\text{mask}}. \quad (5)$$

14 Followed by [6], we use the Intensity Loss to encourage the model to focus on salient features in the  
15 fused image, which is specifically defined as:

$$\mathcal{L}_{\text{int}} = \frac{1}{HW} \|I_f - \max(I_{\text{vis}}^g, I_{\text{ir}}^g)\|_1. \quad (6)$$

16 Here,  $I_{\text{vis}}^g$  and  $I_{\text{ir}}^g$  are the ground truth corresponding to the fused image. We also use  $\mathcal{L}_{\text{SSIM}}$  to train  
17 the model so that the fused image is structurally as similar as possible to the two input images. It is  
18 defined as:

$$\mathcal{L}_{\text{SSIM}} = (1 - \text{SSIM}(I_f, I_{\text{vis}}^g)) + \mu(1 - \text{SSIM}(I_f, I_{\text{ir}}^g)). \quad (7)$$

19 We also compute the gradient loss  $\mathcal{L}_{\text{grad}}$  to ensure the similarity between the fused image and the  
 20 input images in terms of edge features:

$$\mathcal{L}_{\text{grad}} = \frac{1}{HW} \|\nabla I_f - \max(\nabla I_{\text{vis}}^g, \nabla I_{\text{ir}}^g)\|_1, \quad (8)$$

21 and use  $\mathcal{L}_{\text{color}}$  to keep consistent color with input images:

$$\mathcal{L}_{\text{color}} = \frac{1}{HW} \|\mathcal{F}_{CbCr}(I_f) - \mathcal{F}_{CbCr}(I_{\text{vis}}^g)\|_1. \quad (9)$$

22 As mentioned in the main text, we use  $\mathcal{L}_{\text{mask}}$  for saliency-guided regional fusion, which can be  
 23 represented as:

$$\mathcal{L}_{\text{mask}} = \|\mathcal{W}_v \cdot I_v + \mathcal{W}_{ir} \cdot I_{ir} - I_f\|_1. \quad (10)$$

24 Here,  $\mathcal{W}_v$  and  $\mathcal{W}_{ir}$  denote the saliency-based weight maps computed from the corresponding input  
 25 images.  $\mathcal{W}_v$  and  $\mathcal{W}_{ir}$  are computed based on pixel-level visual saliency maps. Specifically, they are  
 26 estimated by measuring the sparsity of the image pixel histograms: the sparser the pixel distribution,  
 27 the higher the corresponding saliency. The computation can be formulated as:

$$\text{Saliency}(i) = \sum_{j=0}^{255} |i - j| \cdot \text{Hist}(j). \quad (11)$$

28 Here,  $i$  represents the grayscale value of the current pixel, and  $j$  denotes the grayscale value of the  
 29 traversed pixels. By computing the saliency values  $S_{ir}(i, j)$  and  $S_v(i, j)$  for each pixel, we can obtain  
 30 the corresponding  $\mathcal{W}_v$  and  $\mathcal{W}_{ir}$ . The specific formulas are given as:

$$\mathcal{W}_v(i, j) = \mu_v + S_v(i, j) - \mu_v \cdot S_{ir}(i, j) \quad (12)$$

$$\mathcal{W}_{ir}(i, j) = 1 - \mathcal{W}_v(i, j) \quad (13)$$

## 32 C Additional experiments of our method

Table 1: Quantitative comparison on Lytro, MFFW and MFI-WHU datasets. The best and second best results are highlighted in **bold** and underline.

| Dataset      | Lytro       |             |             |             | MFFW        |             |             |             | MFI-WHU     |             |             |             |
|--------------|-------------|-------------|-------------|-------------|-------------|-------------|-------------|-------------|-------------|-------------|-------------|-------------|
| Method       | MI          | CC          | Qcb         | PSNR        | MI          | CC          | Qcb         | PSNR        | MI          | CC          | Qcb         | PSNR        |
| DeFusion [2] | 6.27        | 0.97        | 0.59        | <b>77.2</b> | 5.59        | 0.97        | 0.55        | <b>74.4</b> | 6.01        | 0.97        | 0.69        | <b>77.2</b> |
| TC-MoA [9]   | <b>7.45</b> | 0.97        | <b>0.76</b> | 74.8        | 5.34        | 0.96        | <b>0.63</b> | 72.8        | <b>6.76</b> | 0.97        | <b>0.75</b> | 75.6        |
| Text-IF [6]  | 5.63        | 0.97        | <u>0.65</u> | 71.9        | 5.26        | 0.96        | <u>0.61</u> | 70.2        | 5.31        | 0.97        | 0.62        | 72.3        |
| DDFM [8]     | 3.53        | 0.85        | 0.41        | 67.2        | 3.33        | 0.73        | 0.38        | 64.5        | 2.99        | 0.74        | 0.43        | 66.4        |
| CCF [1]      | 5.15        | 0.96        | 0.49        | 66.8        | 4.47        | 0.95        | 0.47        | 66.6        | 4.95        | 0.96        | 0.47        | 67.1        |
| <b>Ours</b>  | <u>6.58</u> | <b>0.98</b> | 0.61        | <u>76.1</u> | <b>5.80</b> | <b>0.97</b> | 0.55        | 71.7        | <u>6.38</u> | <b>0.98</b> | <u>0.71</u> | <u>75.7</u> |

33 **More Quantitative Comparison of Multi-Focus Fusion** As shown in Table 1, we conducted  
 34 comparisons on three datasets in MFIF: Lytro [3], MFFW [5], and MFI-WHU [7]. Our method  
 35 outperforms other approaches on most metrics. Specifically, it achieves either the first or second best  
 36 performance<sup>1</sup> on 9 different metrics, surpassing other comparison methods and demonstrating the  
 37 superiority of our approach in the Multi-Focus Fusion task.

## 38 References

- 39 [1] Bing Cao, Xingxin Xu, Pengfei Zhu, Qilong Wang, and Qinghua Hu. Conditional controllable  
 40 image fusion. *arXiv preprint arXiv:2411.01573*, 2024.
- 41 [2] Pengwei Liang, Junjun Jiang, Xianming Liu, and Jiayi Ma. Fusion from decomposition: A  
 42 self-supervised decomposition approach for image fusion. In *European Conference on Computer*  
 43 *Vision*, pages 719–735. Springer, 2022.

<sup>1</sup>Compare the percentiles of the same value.

- 44 [3] Mansour Nejati, Shadrokh Samavi, and Shahram Shirani. Multi-focus image fusion using  
45 dictionary-based sparse representation. *Information fusion*, 25:72–84, 2015.
- 46 [4] Yang Song, Jascha Sohl-Dickstein, Diederik P Kingma, Abhishek Kumar, Stefano Ermon, and  
47 Ben Poole. Score-based generative modeling through stochastic differential equations. In  
48 *International Conference on Learning Representations*, 2021.
- 49 [5] Shuang Xu, Xiaoli Wei, Chunxia Zhang, Junmin Liu, and Jianshe Zhang. Mffw: A new dataset  
50 for multi-focus image fusion. *arXiv preprint arXiv:2002.04780*, 2020.
- 51 [6] Xunpeng Yi, Han Xu, Hao Zhang, Linfeng Tang, and Jiayi Ma. Text-if: Leveraging semantic text  
52 guidance for degradation-aware and interactive image fusion. In *Proceedings of the IEEE/CVF*  
53 *Conference on Computer Vision and Pattern Recognition*, pages 27026–27035, 2024.
- 54 [7] Hao Zhang, Zhuliang Le, Zhenfeng Shao, Han Xu, and Jiayi Ma. Mff-gan: An unsupervised  
55 generative adversarial network with adaptive and gradient joint constraints for multi-focus image  
56 fusion. *Information Fusion*, 66:40–53, 2021.
- 57 [8] Zixiang Zhao, Haowen Bai, Yuanzhi Zhu, Jianshe Zhang, Shuang Xu, Yulun Zhang, Kai Zhang,  
58 Deyu Meng, Radu Timofte, and Luc Van Gool. Ddfm: denoising diffusion model for multi-  
59 modality image fusion. In *Proceedings of the IEEE/CVF International Conference on Computer*  
60 *Vision*, pages 8082–8093, 2023.
- 61 [9] Pengfei Zhu, Yang Sun, Bing Cao, and Qinghua Hu. Task-customized mixture of adapters for  
62 general image fusion. In *Proceedings of the IEEE/CVF conference on computer vision and*  
63 *pattern recognition*, pages 7099–7108, 2024.
